# Supplementary material for: NADPH oxidase-dependent free radical generation and protein adduct formation in neutrophils
Source: Royal Society of Chemistry journal article supplement (doi:10.1039/d4ra02739f), 2024-01-01

## Supplementary 1

### A

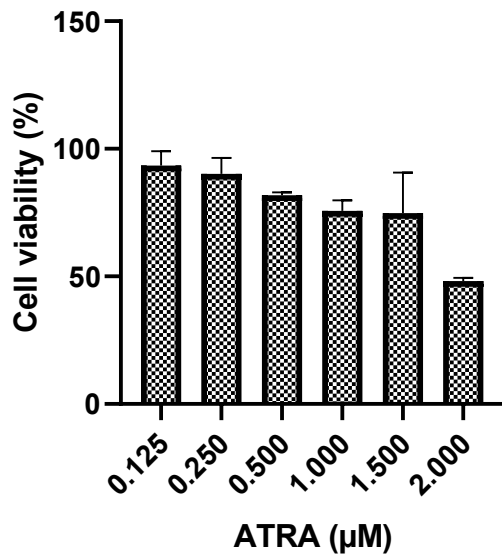

### B

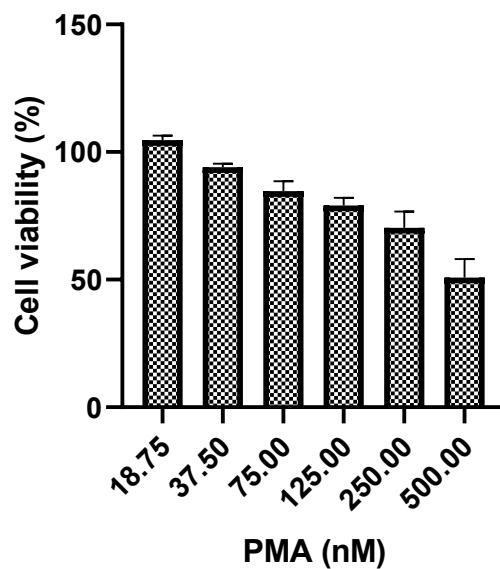

### C

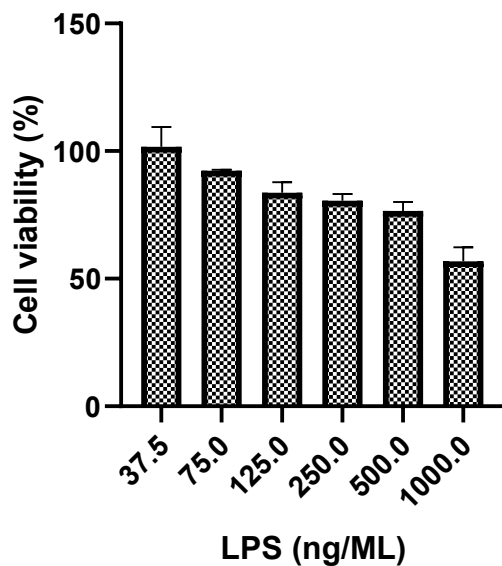

### D

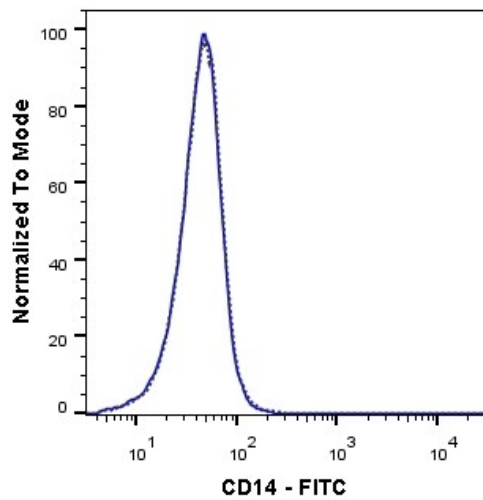

| Sample Name            | Subset Name        | Count |
|------------------------|--------------------|-------|
| 003 HL60 ctrl CD14.fcs | FITC - Area subset | 32108 |
| 004 HL60 RA CD14.fcs   | FITC - Area subset | 34086 |

# Supplementary 2

## A

### CD63

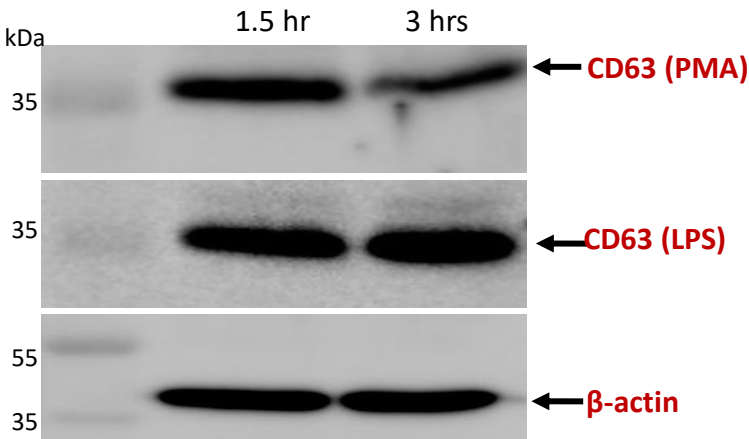

## B

### MPO

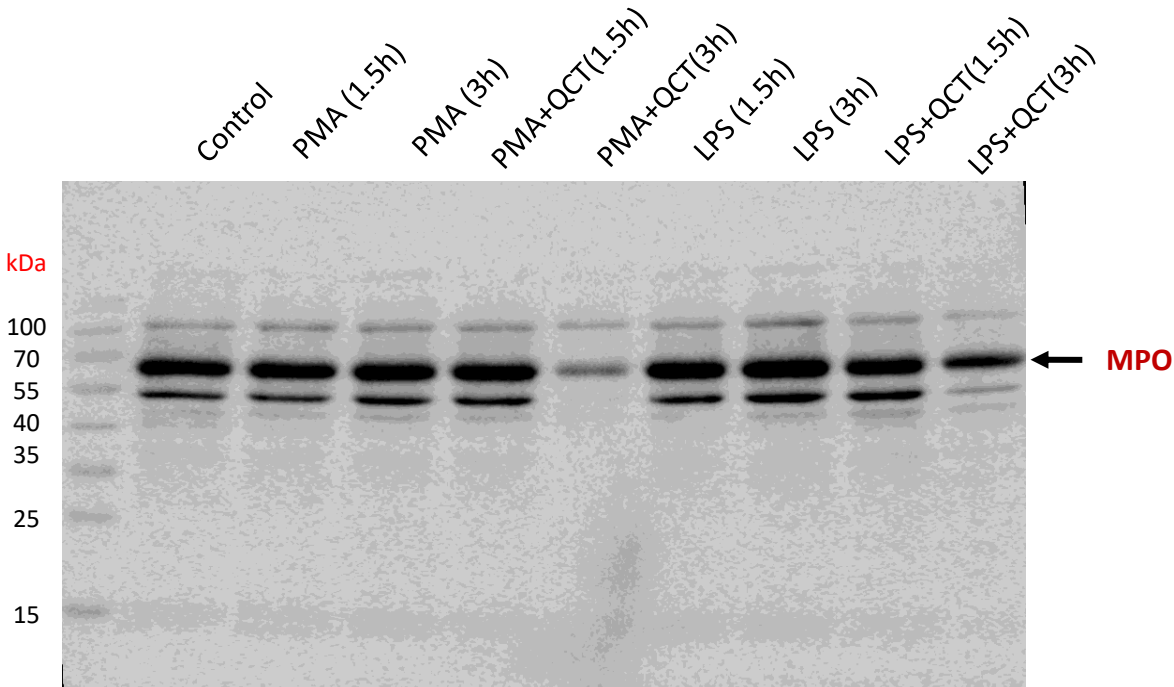

A

Histone blot

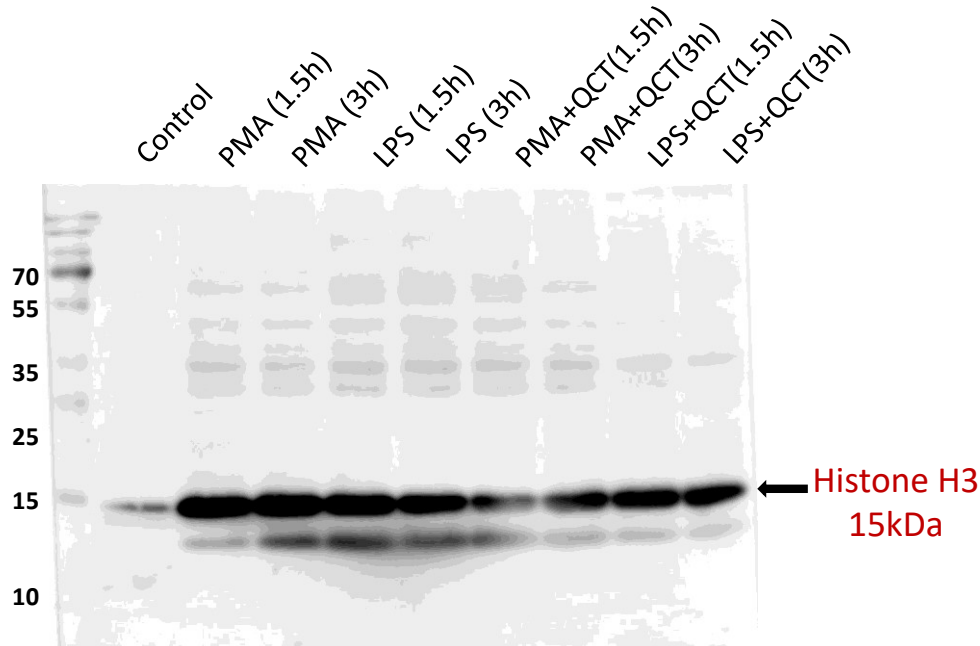

# Supplementary 4

## LOX5 blots

**A**

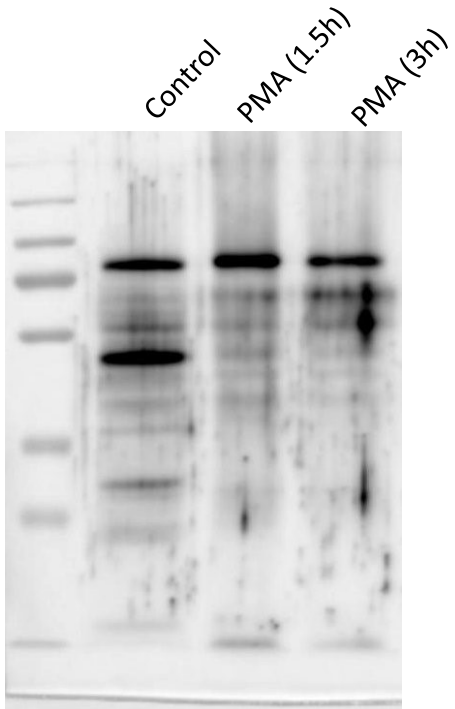

**B**

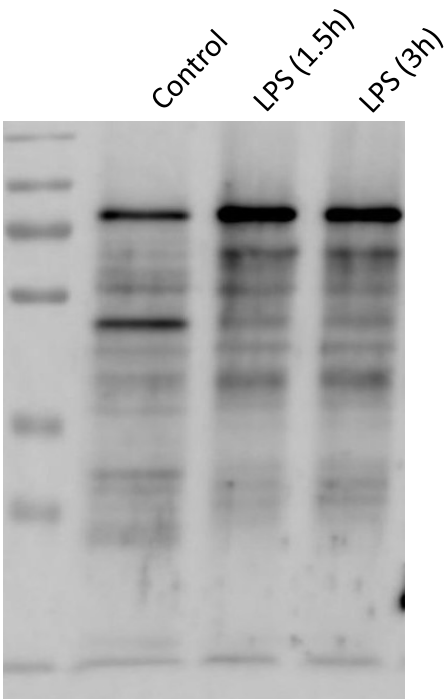

Supplementary 5

PMA-NOX4 blot

A

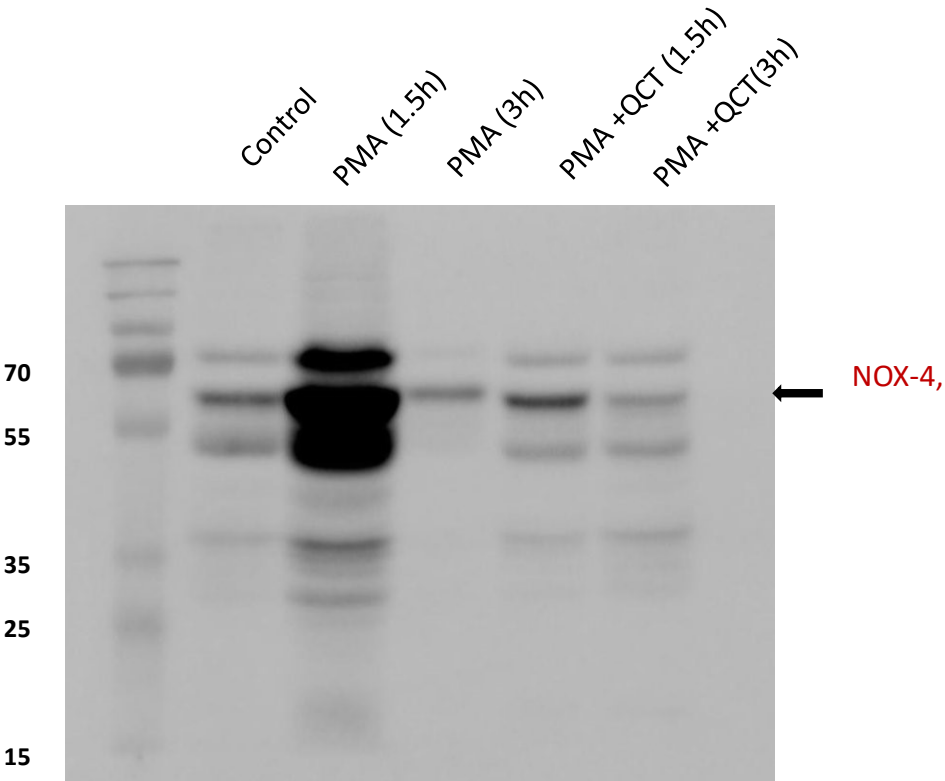

LPS-NOX4 blot

B

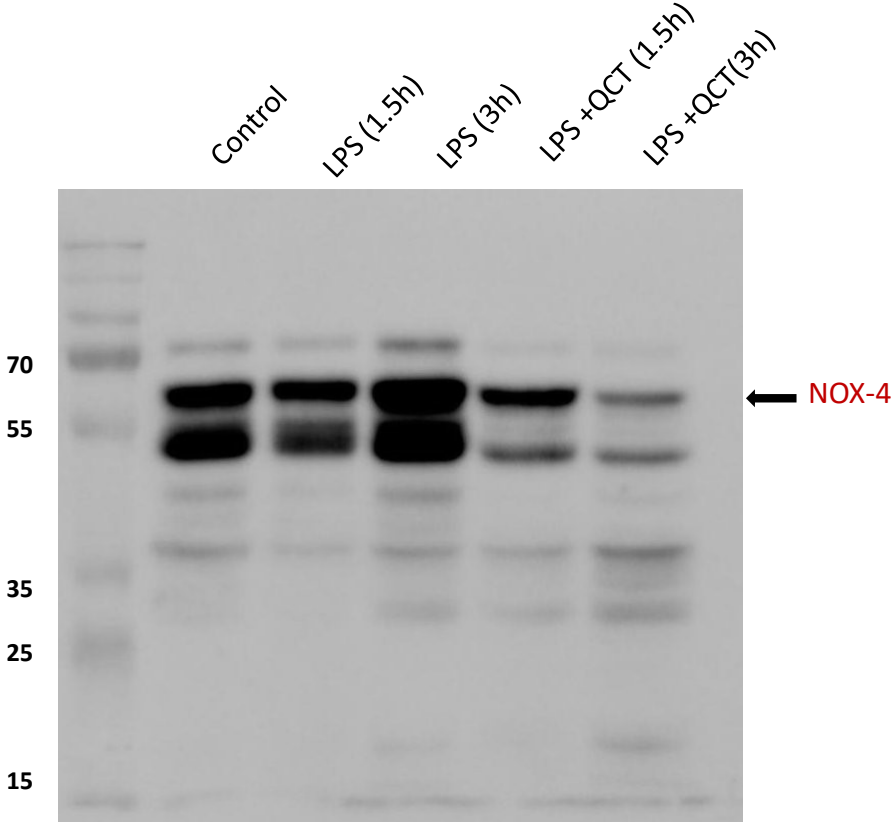

Supplementary 6

PMA-NOX2 blot

A

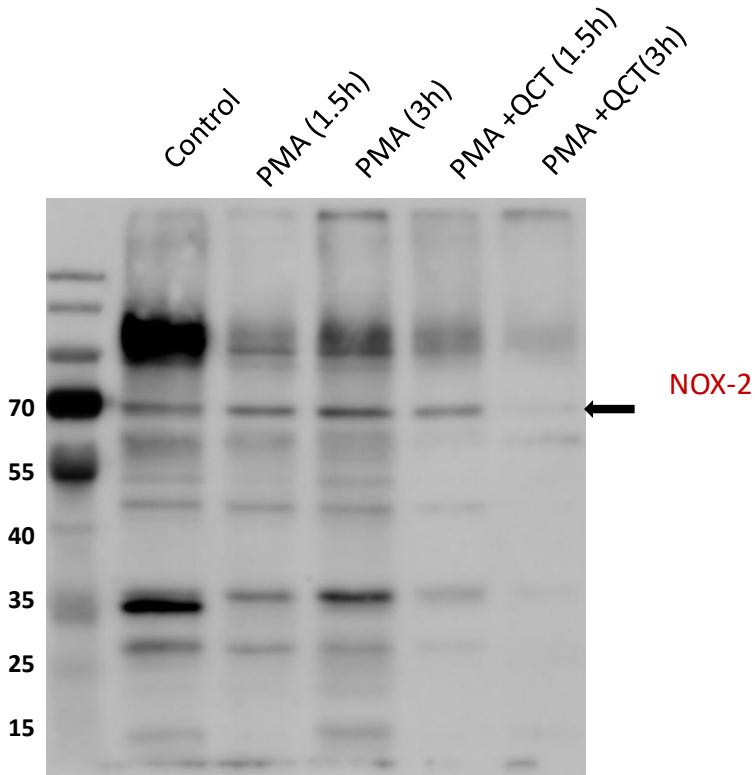

LPS-NOX2 blot

B

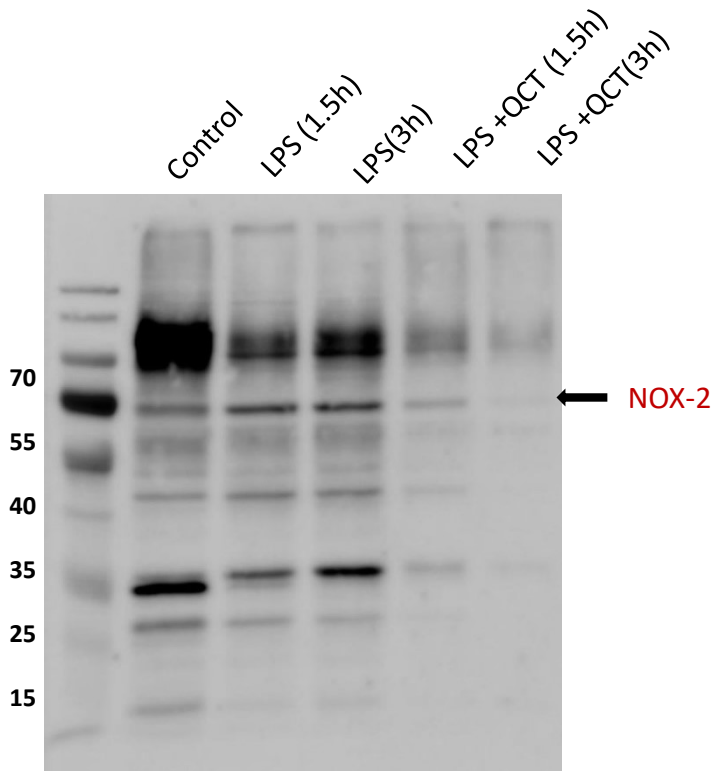

# Supplementary 7

# $\beta$ -actin blots

## CD 63

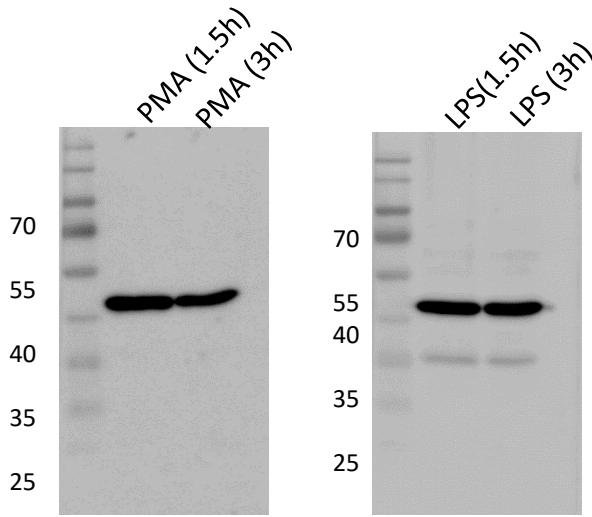

## LOX5

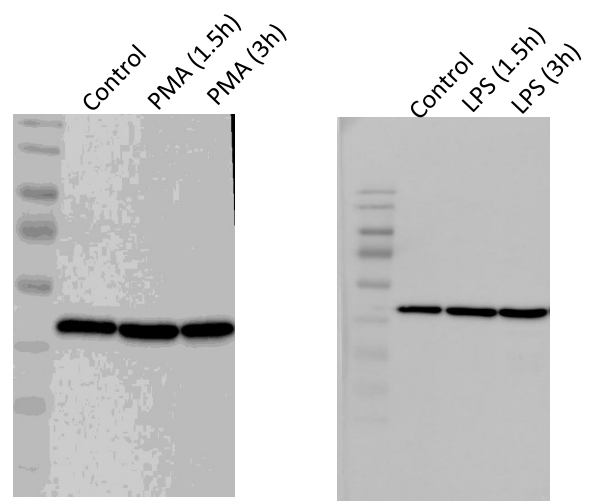

## NOX4

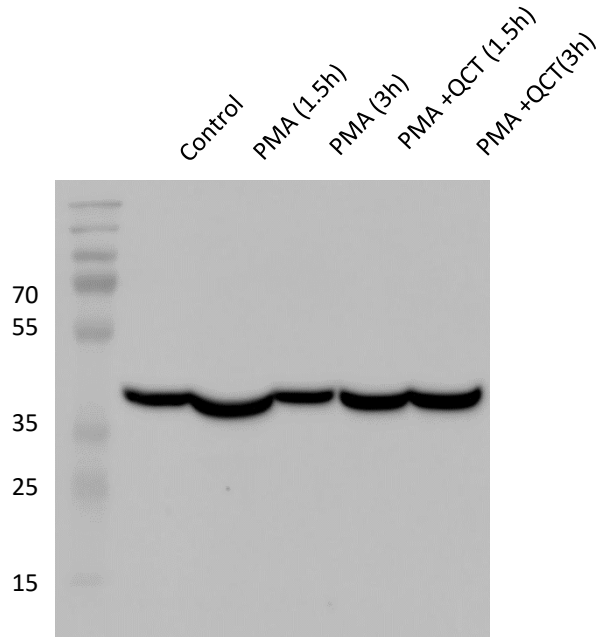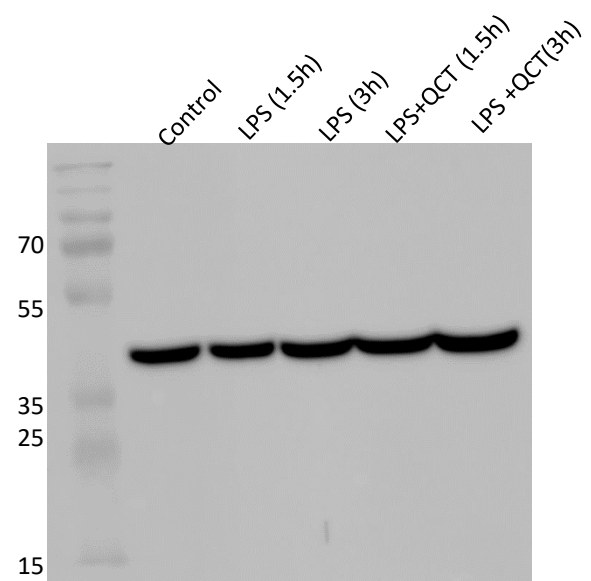

## NOX2

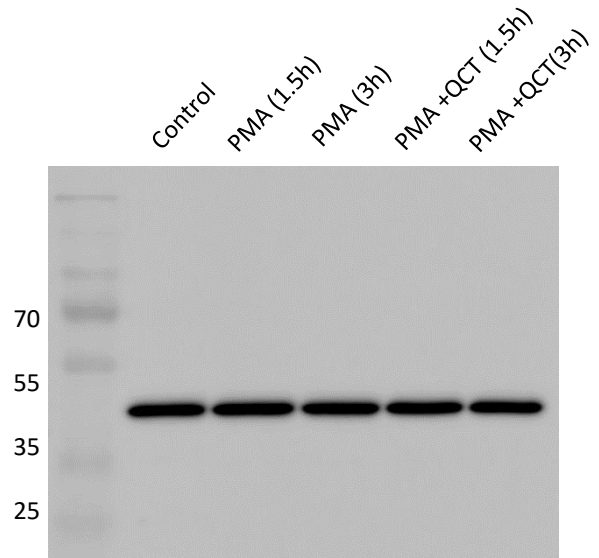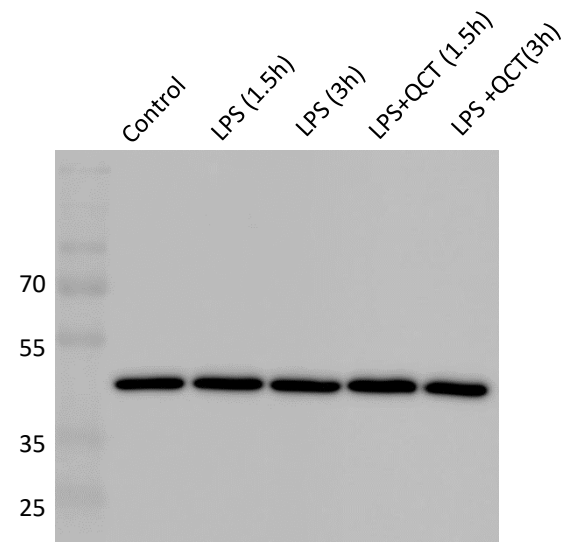

Supplement: d4ra02739f2.pdf [file d4ra02739f2.pdf]
