# Supplementary material for: NADPH oxidase-dependent free radical generation and protein adduct formation in neutrophils
Source: Royal Society of Chemistry journal article supplement (doi:10.1039/d4ra02739f), 2024-01-01
Supplement: d4ra02739f1.pdf [file d4ra02739f1.pdf]

**Supplementary data 1:**

Cell viability evaluation of HL-60 in response to varying concentrations of **(A)** ATRA, **(B)** PMA, **(C)** LPS and **(D)** absence of CD14 expression markers confirms the neutrophil characteristic nature of differentiated HL-60 cells. Values are expressed as mean (A, B, C)  $\pm$  SD calculated from independent experiments; the results obtained were statistically significant (\*\*\*\*P  $\leq$  0.0001).

**Supplementary data 2:**

**(A)** CD-63 blots and **(B)** MPO blots used for confirming the inflammatory status of neutrophils

**Supplementary data 3:**

Blots used for analysis of Histone H3.3 expression in the present study.

**Supplementary data 4:**

Blot used for evaluation of LOX5 expression in response to **(A)** PMA and **(B)** LPS stimulation.

**Supplementary data 5:**

Blot used for evaluation of NOX4 expression in response to **(A)** PMA and **(B)** LPS stimulation.

**Supplementary data 6:**

Blot used for evaluation of NOX4 expression in response to **(A)** PMA and **(B)** LPS stimulation.

**Supplementary data 7:**

$\beta$ -actin control blots used for quantification of CD63, LOX5, NOX4 and NOX2
